# Supplementary material for: SPARC in cancer‐associated fibroblasts is an independent poor prognostic factor in non‐metastatic triple‐negative breast cancer and exhibits pro‐tumor activity
Source: PubMed Central journal article supplement (PMC10099777; doi:10.1002/ijc.34345), 2022-11-30
Supplement: IJC-152-1243-s001.pdf [file IJC-152-1243-s001.pdf]

**SPARC in cancer-associated fibroblasts is an independent poor prognostic factor in non-metastatic triple-negative breast cancer and exhibits pro-tumor activity**

Lindsay B Alcaraz<sup>1#</sup>, Aude Mallavialle<sup>1</sup>, Caroline Mollevi<sup>2,3</sup>, Florence Boissière-Michot<sup>4</sup>, Hanane Mansouri<sup>1,5</sup>, Joelle Simony-Lafontaine<sup>4</sup>, Valérie Laurent-Matha<sup>1</sup>, Thierry Chardès<sup>1</sup>, William Jacot<sup>1,4,6</sup>, Andrei Turtoi<sup>1</sup>, Pascal Roger<sup>1,7\*</sup>, Séverine Guiu<sup>1,6\*</sup>, Emmanuelle Liaudet-Coopman<sup>1\*#</sup>

**- Supplementary Material and Methods**

**RT-qPCR**

**- Supplementary Tables**

**Table S1. Univariate and multivariate Cox proportional hazard models to identify prognostic factors of overall survival (OS) in TNBC.**

**Table S2. Clinicopathological characteristics in function of SPARC expression (SPARC<sup>+</sup> and SPARC<sup>-</sup>) in CAFs.**

**- Supplementary Figures**

**Figure S1. Relapse-free survival in function of the SPARC expression status in TNBC cancer cells.**

**Figure S2. Relapse-free survival in function of SPARC status in TAMs. Patients with TNBC were**

**Figure S3. Relapse-free survival according in function of SPARC expression status in endothelial cells.**

**Figure S4. Relapse-free survival according to SPARC expression status in TILs.**

**Figure S5. THP1 monocyte differentiation into M2 macrophages**

**Figure S6. Differential *SPARC* gene expression in different cell populations within TNBC samples by single-cell RNA-seq data analysis.**

**Figure S7. Expression of *SPARC* and *POSTN* mRNAs in TNBC by single-cell RNA-seq analysis**

**Figure S8. Expression of *SPARC* and *POSTN* mRNAs in CAF-S1 clusters in breast cancer by single-cell RNA-seq analysis**

**Figure S9. Co-localization of SPARC with periostin in TNBC PDX**

**Figure S10. Immunodepletion of SPARC secreted in the conditioned medium from HMFs.**

## Supplementary Material and Methods

### RT-qPCR

RNA was isolated using the RNeasy® Plus Mini Kit (Qiagen, Hilden, Germany) and 1 µg of total RNA was reverse transcribed using the SuperScript™ III reverse transcriptase kit (Invitrogen). Real-time PCR was performed using SYBR® Premix Ex Taq™ (Tli RNaseH Plus) (Takara Clontech) on a Light Cycler 480 SYBR Green I master and a Light Cycler 480 apparatus (both from Roche Diagnostics, Indianapolis, IN) with the following primers: human CD206 forward: 5'-GGGTTGCTATCACTCTCTATG-3'; human CD206 reverse: 5'-TTTCTTGTCTGTTGCCGTAGTT-3'; human GAPDH forward: 5'-GAAGGTCGGAGTCAACGGATT-3'; human GAPDH reverse: 5'-TGACGGTGCCATGGAATTTG-3'. *CD206* expression was normalized to *GAPDH* expression.

| Clinical and tumor characteristics | Univariate analysis<br>HR 95% CI<br>N = 148 | Multivariate analysis<br>HR 95% CI<br>N = 148 |
|------------------------------------|---------------------------------------------|-----------------------------------------------|
| <b>Age</b>                         | N=148                                       |                                               |
| < 55 years                         | 1                                           |                                               |
| ≥ 55 years                         | 2.21 [1.03-4.75]                            |                                               |
|                                    | <b>P = 0.027</b>                            |                                               |
| <b>Tumor size</b>                  | N=148                                       |                                               |
| T1                                 | 1                                           | 1                                             |
| T2                                 | 3.04 [1.17-7.93]                            | 1.99 [0.74-5.30]                              |
| T3/T4                              | 6.73 [2.34-19.38]                           | 3.66 [1.22-11.0]                              |
|                                    | <b>P &lt; 0.001</b>                         | <b>P = 0.050</b>                              |
| <b>Nodal status</b>                | N=148                                       |                                               |
| N-                                 | 1                                           | 1                                             |
| N+                                 | 2.47 [1.36-4.47]                            | 2.38 [1.25-4.55]                              |
|                                    | <b>P = 0.002</b>                            | <b>P = 0.008</b>                              |
| <b>Histological grade (SBR)</b>    | N=146                                       |                                               |
| 1-2                                | 1                                           |                                               |
| 3                                  | 1.07 [0.45-2.53]                            |                                               |
|                                    | <b>P = 0.883</b>                            |                                               |
| <b>Histology</b>                   | N=145                                       |                                               |
| Ductal                             | 1                                           |                                               |
| Lobular                            | 0.70 [0.22-2.29]                            |                                               |
| Other                              | 1.17 [0.42-3.29]                            |                                               |
|                                    | <b>P = 0.777</b>                            |                                               |
| <b>Adjuvant chemotherapy</b>       | N=148                                       |                                               |
| No                                 | 1                                           | 1                                             |
| Yes                                | 0.36 [0.20-0.64]                            | 0.33 [0.18-0.60]                              |
|                                    | <b>P = 0.006</b>                            | <b>P &lt; 0.001</b>                           |

|                                              |                         |
|----------------------------------------------|-------------------------|
| <b>Basal-like phenotype</b>                  | N=147                   |
| Yes                                          | 1                       |
| No                                           | 1.16 [0.64-2.08]        |
|                                              | <i>P</i> = 0.624        |
| <b>SPARC expression in tumor cells</b>       | N=132                   |
| Negative                                     | 1                       |
| Positive                                     | 0.75 [0.40-1.41]        |
|                                              | <i>P</i> = 0.363        |
| <b>SPARC expression in CAFs</b>              | N=126                   |
| Negative                                     | 1                       |
| Positive                                     | 1.92 [0.59-6.23]        |
|                                              | <i>P</i> = 0.235        |
| <b>SPARC expression in TAMs</b>              | N=118                   |
| Negative                                     | 1                       |
| Positive                                     | 0.59 [0.29-1.16]        |
|                                              | <b><i>P</i> = 0.139</b> |
| <b>SPARC expression in endothelial cells</b> | N=109                   |
| Negative                                     | 1                       |
| Positive                                     | 0.73 [0.35-1.51]        |
|                                              | <i>P</i> = 0.401        |
| <b>SPARC expression in TILs</b>              | N=82                    |
| Negative                                     | 1                       |
| Positive                                     | 1.10 [0.32-3.75]        |
|                                              | <i>P</i> = 0.882        |
| <b>TIL density</b>                           | N=142                   |
| [0-1]                                        | 1                       |
| >1                                           | 0.94 [0.50-1.75]        |
|                                              | <i>P</i> = 0.839        |
| <b>PD-L1 expression in tumor cells</b>       | N=136                   |
| < 1%                                         | 1                       |
| ≥ 1%                                         | 0.91 [0.49-1.70]        |
|                                              | <i>P</i> = 0.770        |

|                                 |                  |
|---------------------------------|------------------|
| <b>PD-L1 expression in TILs</b> | N=134            |
| 0                               | 1                |
| ]0-50[                          | 1.90 [0.66-5.45] |
| ≥ 50                            | 1.10 [0.33-3.66] |
|                                 | <i>P</i> = 0.238 |
| <b>PD1 expression in TILs</b>   | N=140            |
| 0                               | 1                |
| ]0-50[                          | 0.94 [0.40-2.25] |
| ≥ 50                            | 0.73 [0.22-2.38] |
|                                 | <i>P</i> = 0.832 |
| <b>Fibrosis</b>                 | N=137            |
| ≤ 50%                           | 1                |
| > 50%                           | 1.10 [0.60-2.02] |
|                                 | <i>P</i> = 0.746 |
| <b>TAMs (inflammation)</b>      | N=143            |
| 0/1                             | 1                |
| 2                               | 1.11[0.51-2.43]  |
| 3                               | 0.67 [0.31-1.45] |
|                                 | <i>P</i> = 0.285 |

**Table S1. Univariate and multivariate Cox proportional hazard models to identify prognostic factors of overall survival (OS) in TNBC**

SBR: Scarff-Bloom-Richardson; CAFs: cancer-associated fibroblasts; TAMs: tumor-associated macrophages; TILs: tumor-infiltrating lymphocytes  
HR = hazard ratio; CI = confidence interval; p values in bold, statistically significant.

| Clinical and tumor characteristics | SPARC expression in CAFs<br>Negative (N=15) | SPARC expression in CAFs<br>Positive (N=111) | <i>P</i> value |
|------------------------------------|---------------------------------------------|----------------------------------------------|----------------|
| <b>Age</b>                         |                                             |                                              | 0.018          |
| < 55 years                         | 1 (6.7%)                                    | 43 (38.7%)                                   |                |
| ≥ 55 years                         | 14 (93.3%)                                  | 68 (61.3%)                                   |                |
| <b>Tumor size</b>                  |                                             |                                              | 0.334          |
| T1                                 | 6 (40.0%)                                   | 36 (32.4%)                                   |                |
| T2                                 | 9 (60.0%)                                   | 59 (53.2%)                                   |                |
| T3/T4                              | 0                                           | 16 (14.4%)                                   |                |
| <b>Nodal status</b>                |                                             |                                              | 0.863          |
| N-                                 | 9 (60.0%)                                   | 64 (57.7%)                                   |                |
| N+                                 | 6 (40.0%)                                   | 47 (42.3%)                                   |                |
| <b>Histological grade (SBR)</b>    |                                             |                                              | 0.130          |
| 1-2                                | 3 (20.0%)                                   | 8 (7.3%)                                     |                |
| 3                                  | 12 (80.0%)                                  | 101 (92.7%)                                  |                |
| <b>Histology</b>                   |                                             |                                              | 0.080          |
| Ductal                             | 11 (73.3%)                                  | 95 (88.0%)                                   |                |
| Lobular                            | 3 (20.0%)                                   | 5 (4.6%)                                     |                |
| Other                              | 1 (6.7%)                                    | 8 (7.4%)                                     |                |
| <b>Adjuvant chemotherapy</b>       |                                             |                                              | 0.186          |
| No                                 | 7 (46.7%)                                   | 33 (29.7%)                                   |                |

|                                              |            |            |              |
|----------------------------------------------|------------|------------|--------------|
| Yes                                          | 8 (53.3%)  | 78 (70.3%) |              |
| <b>Basal-like phenotype</b>                  |            |            | <b>0.678</b> |
| ≤ 10%                                        | 9 (60.0%)  | 72 (65.4%) |              |
| Basal                                        | 6 (40.0%)  | 38 (34.6%) |              |
| <b>SPARC expression in tumor cells</b>       |            |            | <b>0.603</b> |
| Negative                                     | 8 (53.3%)  | 67 (60.4%) |              |
| Positive                                     | 7 (46.7%)  | 44 (39.6%) |              |
| <b>SPARC expression in TAMs</b>              |            |            | <b>0.007</b> |
| Negative                                     | 7 (58.3%)  | 20 (19.4%) |              |
| Positive                                     | 5 (41.7%)  | 83 (80.6%) |              |
| <b>SPARC expression in endothelial cells</b> |            |            | <b>0.026</b> |
| Negative                                     | 7 (50.0%)  | 20 (22.0%) |              |
| Positive                                     | 7 (50.0%)  | 71 (78.0%) |              |
| <b>SPARC expression in TILs</b>              |            |            | <b>1.000</b> |
| Negative                                     | 8 (100.0%) | 65 (89.0%) |              |
| Positive                                     | 0          | 8 (11.0%)  |              |
| <b>TIL density</b>                           |            |            | <b>0.127</b> |
| [0-1]                                        | 6 (42.9%)  | 26 (23.9%) |              |
| > 1                                          | 8 (57.1%)  | 83 (76.1%) |              |
| <b>PD-L1 expression in tumor cells</b>       |            |            | <b>0.109</b> |
| < 1%                                         | 7 (53.9%)  | 31 (28.4%) |              |
| ≥ 1%                                         | 6 (46.1%)  | 78 (71.6%) |              |



|                                 |            |            |              |
|---------------------------------|------------|------------|--------------|
| <b>PD-L1 expression in TILs</b> |            |            | <b>0.049</b> |
| 0                               | 4 (30.8%)  | 10 (9.2%)  |              |
| ]0-50[                          | 7 (53.8%)  | 61 (56.0%) |              |
| ≥ 50                            | 2 (15.4%)  | 38 (34.8%) |              |
| <b>PD1 expression in TILs</b>   |            |            | <b>0.415</b> |
| 0                               | 2 (15.4%)  | 11 (10.2%) |              |
| ]0-50[                          | 8 (61.5%)  | 83 (76.9%) |              |
| ≥ 50                            | 3 (23.1%)  | 14 (12.9%) |              |
| <b>Fibrosis</b>                 |            |            | <b>0.028</b> |
| ≤ 50%                           | 3 (20.0%)  | 56 (51.4%) |              |
| > 50%                           | 12 (80.0%) | 53 (48.6%) |              |
| <b>TAMs (inflammation)</b>      |            |            | <b>0.349</b> |
| 0/1                             | 4 (28.6%)  | 15 (13.8%) |              |
| 2                               | 3 (21.4%)  | 32 (29.4%) |              |
| 3                               | 7 (50.0%)  | 62 (56.9%) |              |

**Table S2. Clinicopathological characteristics in function of SPARC expression (SPARC<sup>+</sup> and SPARC<sup>-</sup>) in CAFs**

SBR: Scarff-Bloom-Richardson; CAFs: cancer-associated fibroblasts; TAMs: tumor-associated macrophages; TILs: tumor-infiltrating lymphocytes.

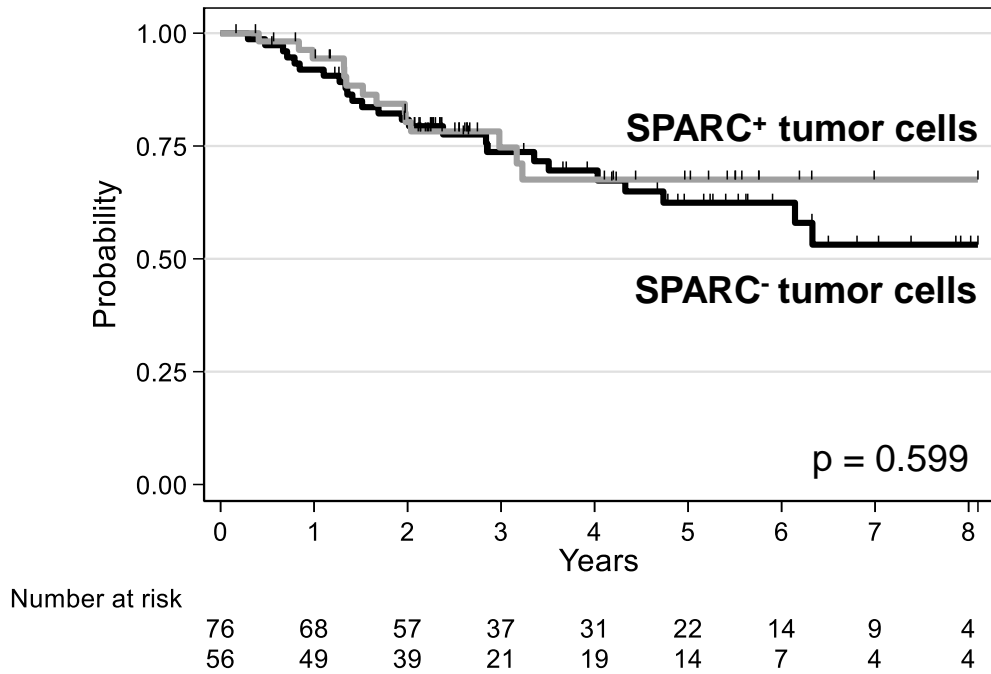

**Figure S1. Relapse-free survival in function of the SPARC expression status in TNBC cancer cells.**

Patients with TNBC were divided in two subgroups according to SPARC expression in tumor cells: SPARC<sup>+</sup> and SPARC<sup>-</sup>.

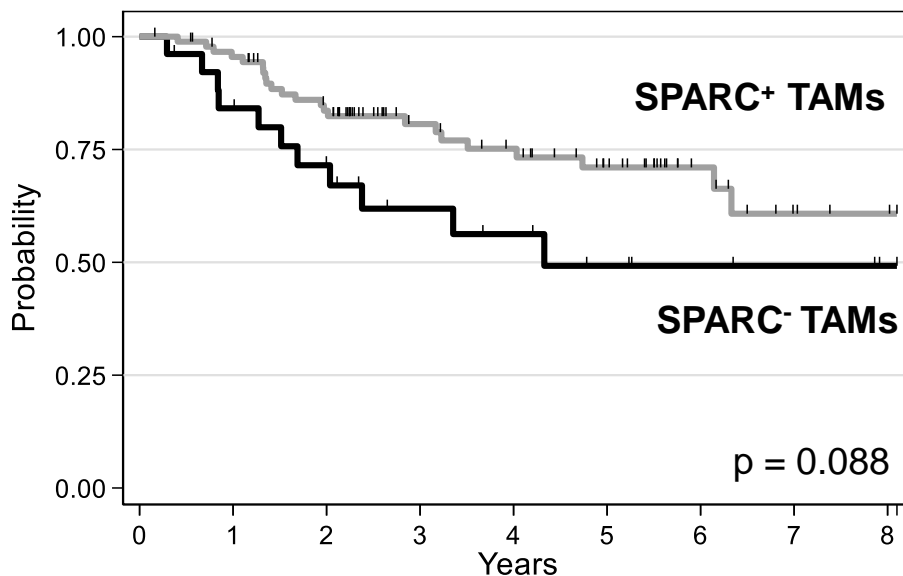

| Number at risk |  | 0  | 1  | 2  | 3  | 4  | 5  | 6  | 7 | 8 |
|----------------|--|----|----|----|----|----|----|----|---|---|
| SPARC+         |  | 27 | 20 | 16 | 11 | 9  | 6  | 4  | 3 | 1 |
| SPARC-         |  | 91 | 84 | 69 | 45 | 39 | 28 | 15 | 8 | 5 |

**Figure S2. Relapse-free survival in function of SPARC status in TAMs.**

Patients with TNBC were divided in two subgroups according to SPARC expression in TAMs: SPARC+ and SPARC-.

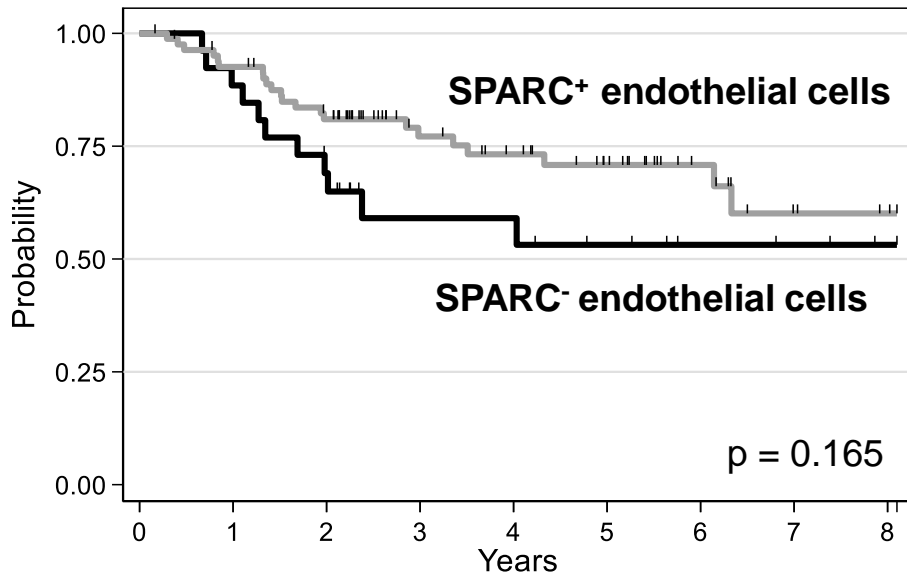

Number at risk

|    |    |    |    |    |    |    |   |   |
|----|----|----|----|----|----|----|---|---|
| 27 | 23 | 17 | 10 | 10 | 7  | 4  | 3 | 1 |
| 82 | 74 | 62 | 40 | 34 | 25 | 15 | 8 | 5 |

**Figure S3. Relapse-free survival according in function of SPARC expression status in endothelial cells.**

Patients with TNBC were divided in two subgroups according to SPARC expression in endothelial cells within the tumor microenvironment: SPARC<sup>+</sup> and SPARC<sup>-</sup>.

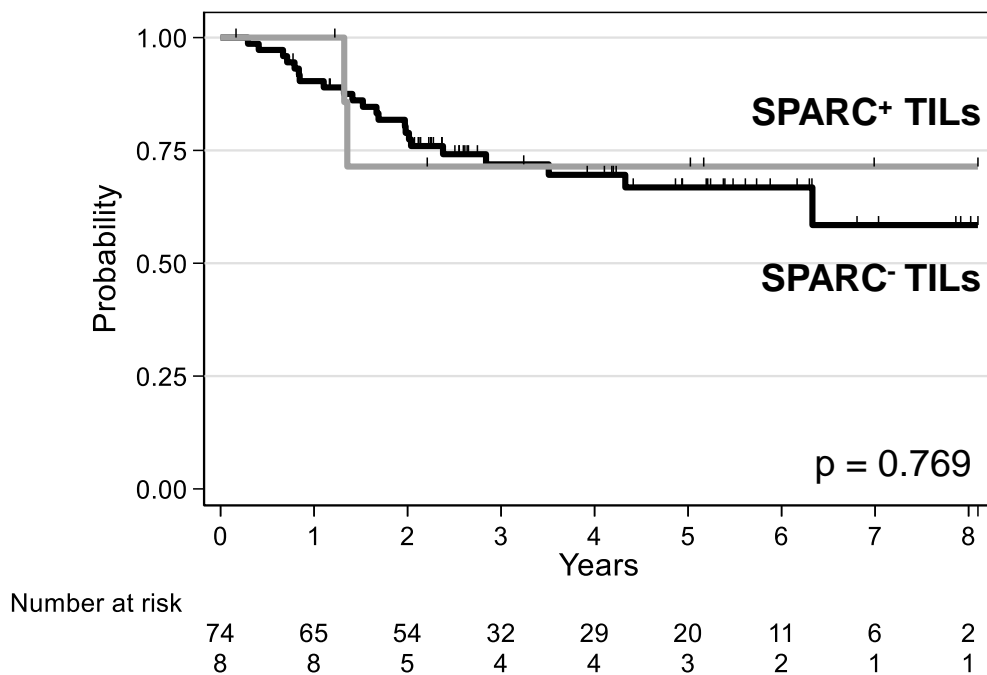

**Figure S4. Relapse-free survival according to SPARC expression status in TILs.** Patients with TNBC were divided in two subgroups according to SPARC expression in TILs: SPARC<sup>+</sup> and SPARC<sup>-</sup>.

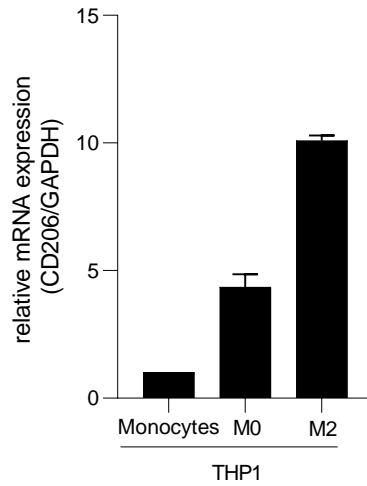

**Figure S5. THP1 monocyte differentiation into M2 macrophages.**

mRNA expression of the M2 macrophage marker CD206 was quantified by RT-qPCR in THP1 monocytes, M0-, and M2-polarized THP1 macrophages. Data were normalized to GAPDH expression level. Results are expressed as mean  $\pm$  SD (n = 3).

| <b>SPARC</b>         | <b>myCAFs</b> | <b>iCAFs</b> | <b>imPVL</b> | <b>dPVL</b> | <b>Myoepithelial</b> | <b>Endothelial</b> |
|----------------------|---------------|--------------|--------------|-------------|----------------------|--------------------|
| <b>myCAFs</b>        | -             | 2.39e-63     |              | 1.07e-25    | 4.26e-59             | 3.19e-33           |
| <b>iCAFs</b>         | 2.39e-63      | -            | 2.22e-15     | 1.01e-51    |                      | 5.48e-120          |
| <b>imPVL</b>         |               | 2.22e-15     | -            |             | 8.09e-22             |                    |
| <b>dPVL</b>          | 1.07e-25      | 1.01e-51     |              | -           | 9.12e-6              |                    |
| <b>Myoepithelial</b> | 4.26e-59      |              | 8.09e-22     | 9.12e-6     | -                    | 3.78e-24           |
| <b>Endothelial</b>   | 3.19e-33      | 5.48e-120    |              |             | 3.78e-24             | -                  |

**Figure S6. Differential *SPARC* gene expression in different cell populations within TNBC samples by single-cell RNA-seq data analysis.**

The previously published single-cell RNA-seq dataset PRJEB35405 included five patients with TNBC<sup>9</sup>. P values were calculated with the Wilcoxon Rank Sum test and adjusted using the Bonferroni correction based on the total number of genes.

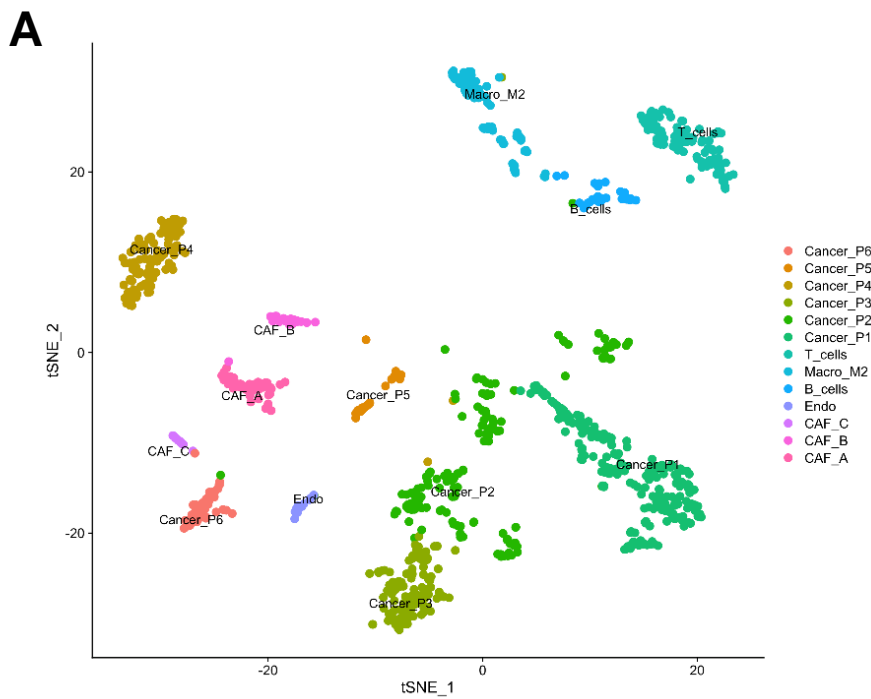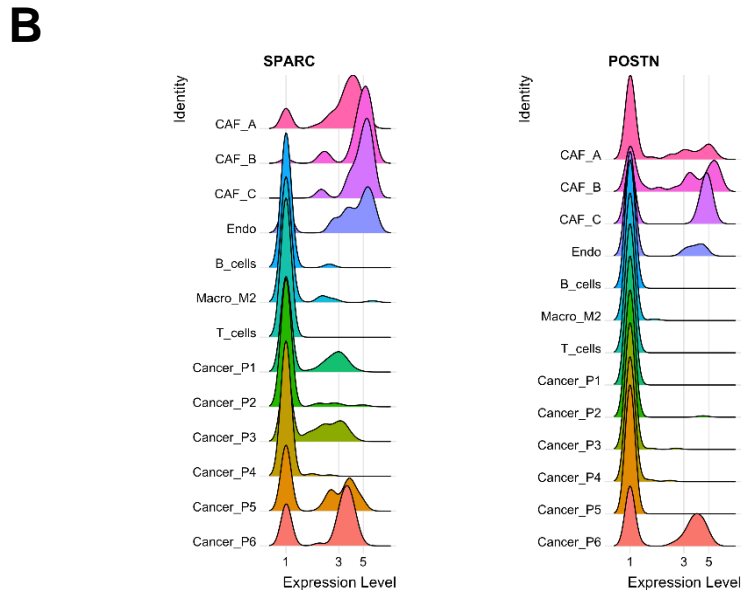

**Figure S7. Expression of *SPARC* and *POSTN* mRNAs in TNBC by single-cell RNA-seq analysis.**

**(A) Cell populations.** Thirteen cell populations were identified by single-cell RNA-seq analysis of the previously published GSE118390 dataset (n=6 TNBC samples), according to<sup>10</sup>.

**(B) *SPARC* and *POSTN* mRNA expression.** *SPARC* and *POSTN* mRNA relative expressions in each of the 13 cell populations identified by single-cell RNA-seq analysis according to<sup>10</sup>. Individual cell populations were annotated as published in the original single-cell RNA-seq study<sup>10</sup> except for TNBC cells that are labelled Cancer\_P1, \_P2, \_P3, \_P4, \_P5, \_P6 (patient 1 to 6, respectively).



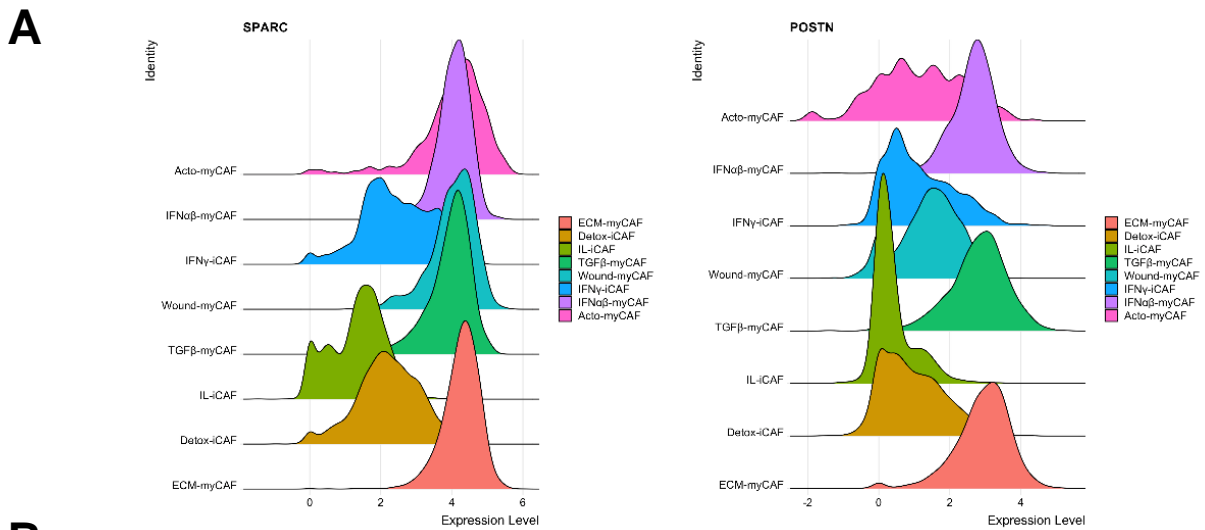

**B**

| SPARC                    | Acto-myCAF | IFN $\alpha\beta$ -myCAF | IFN $\gamma$ -iCAF | Wound-myCAF | TGF $\beta$ -myCAF | IL-iCAF   | Detox-iCAF | ECM-myCAF |
|--------------------------|------------|--------------------------|--------------------|-------------|--------------------|-----------|------------|-----------|
| Acto-myCAF               | -          |                          | 2.84e-76           |             |                    | 1.47e-139 | 6.54e-116  |           |
| IFN $\alpha\beta$ -myCAF |            | -                        | 4.88e-173          |             |                    | 0         | 0          |           |
| IFN $\gamma$ -iCAF       | 2.84e-76   | 4.88e-173                | -                  | 1.26e-192   | 6.87e-222          | 5.86e-153 |            | 0         |
| Wound-myCAF              |            |                          | 1.26e-192          | -           |                    | 0         | 0          |           |
| TGF $\beta$ -myCAF       |            |                          | 6.87e-222          |             | -                  | 0         | 0          |           |
| IL-iCAF                  | 1.47e-139  | 0                        | 5.86e-153          | 0           | 0                  | -         | 0          | 0         |
| Detox-iCAF               | 6.54e-116  | 0                        |                    | 0           | 0                  | 0         | -          | 0         |
| ECM-myCAF                |            |                          | 0                  |             |                    | 0         | 0          | -         |

**Figure S8. Expression of *SPARC* and *POSTN* mRNAs in CAF-S1 clusters in breast cancer by single-cell RNA-seq analysis.**

**(A)** Eight CAF-S1 clusters were identified in the previously published single-cell RNA-seq dataset EGAS00001004030 ( $n = 8$  primary breast cancer samples) according to <sup>11</sup>. *SPARC* and *POSTN* mRNA relative expression in the eight CAF-S1 clusters, according to <sup>11</sup>, is shown. Individual CAF-S1 clusters were annotated as published in the original single-cell RNA-seq study <sup>11</sup>. According to <sup>11</sup>, myCAFs were identified in the following five clusters: ECM-myCAF: associated with extracellular matrix (ECM) remodeling, cell-substrate adhesion, and collagen formation; TGF $\beta$ -myCAF: associated with TGF $\beta$  signaling pathway and matrisome; Wound-myCAF: associated with assembly of collagen fibrils and wound healing; IFN $\alpha\beta$ -myCAF: associated with IFN $\alpha/\beta$  signaling; Acto-myCAF: associated with the actomyosin complex. iCAF were identified in the following three clusters: Detox-iCAF: associated with the detoxification and inflammatory responses; IL-iCAF: associated with the response to growth factors, TNF signaling, and interleukin (IL) pathway; IFN $\gamma$ -iCAF: associated with the response to IFN $\gamma$  and cytokine-mediated signaling pathways.

**(B)** Differential *SPARC* gene expression analysis in the indicated cell populations; p values were calculated with the Wilcoxon Rank Sum test and adjusted using the Bonferroni correction based on the total number of genes.

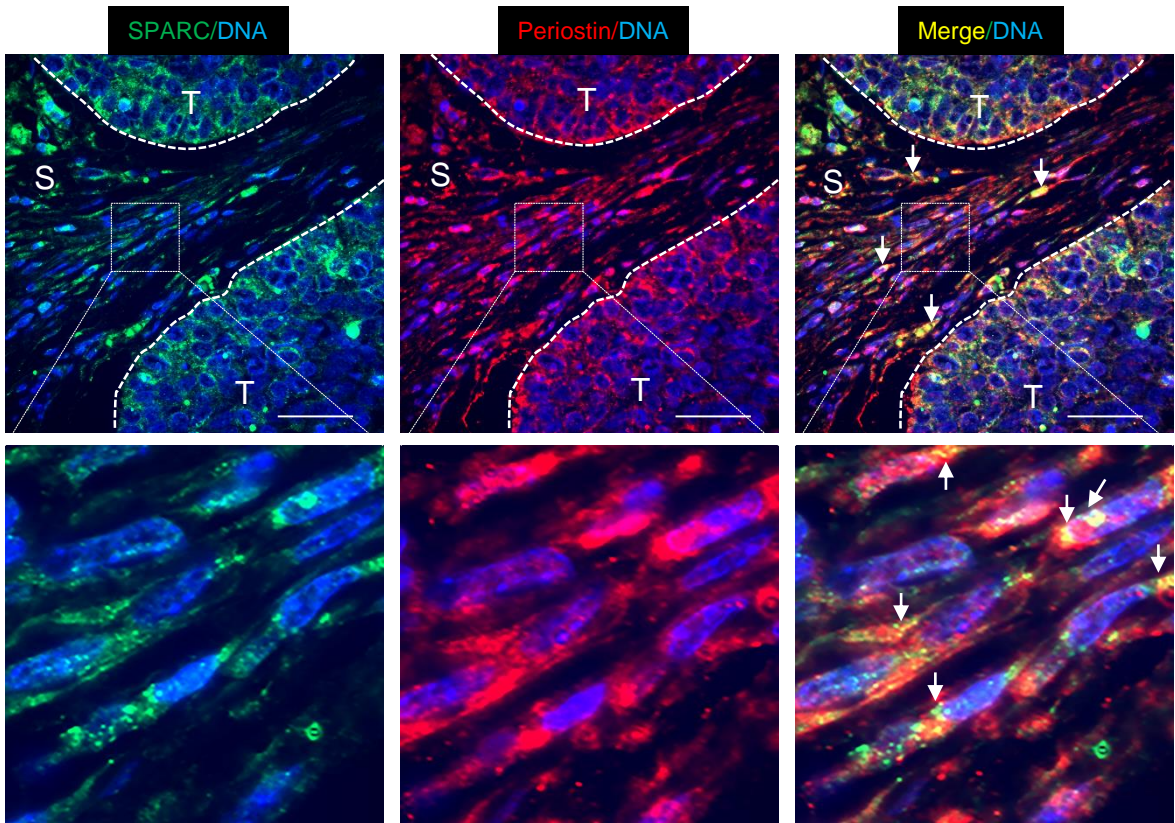

**Figure S9. Co-localization of SPARC with periostin in TNBC PDX.**

PDX B1995 tumor sections were co-incubated with an anti-SPARC polyclonal antibody (15274-1-AP) (green) and an anti-periostin monoclonal antibody (Proteintech) (red). Nuclei were stained with Hoechst 33342 (blue). Top panels: SPARC, periostin, and merge. Bottom panels: higher magnification of the boxed areas. Arrows indicate SPARC and periostin co-localization. Scale bar, 10  $\mu$ m.

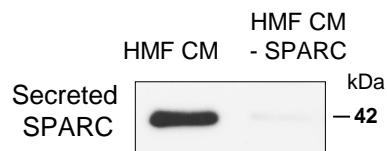

**Figure S10. Immunodepletion of SPARC secreted in the conditioned medium from HMFs.** SPARC was immunodepleted or not from HMF CM by immunoprecipitation. SPARC immunodepletion in HMF CM (HMF CM - SPARC) was confirmed by western blot analysis with an anti-SPARC monoclonal antibody (clone AON-5031).
